# Supplementary material
Source: publisher figshare collection journal article supplement (https://adisjournals.figshare.com/articles/dataset/_/23146703)
Supplement: Supplementary file 1 [file 2]

## **Eine Podcast-Diskussion über die aktuelle Behandlungslandschaft bei Nierenzellkarzinom**

Philipp Ivanyi<sup>1,3,4</sup>, Jonas Paul Wiegmann<sup>1,4</sup>, Hendrik Eggers<sup>1</sup>, Viktor Grünwald<sup>2,3</sup>

- (1) Abteilung für Hämatologie, Hämostaseologie, Onkologie und Stammzelltransplantation. Claudia von Schilling-Center, Comprehensive Cancer Center, Medizinische Hochschule Hannover, Hannover
- (2) Abteilung für Urologie, Abteilung für internistische Onkologie, Leiter der interdisziplinären Uro-Onkologie, Westdeutsches Tumorzentrum, Universitätsklinikum Essen
- (3) Interdisziplinäre Arbeitsgruppe Nierenzellkarzinom der Deutschen Krebsgesellschaft (IAG-N-DKG)
- (4) Interdisziplinäre Immunonkologische Arbeitsgruppe, Claudia von Schilling-Center, Comprehensive Cancer Center Hannover (ICOG-CCC-H)

### **Korrespondenzautor:**

PD Dr. med. Philipp Ivanyi. Medizinische Hochschule Hannover, OE 6860, Carl-Neuberg Str. 1, 30625 Hannover. Ivanyi.philipp@mh-hannover.de

**ZUSAMMENFASSUNG:**

In den letzten 15 Jahren wurden in Bezug auf die medikamentöse Behandlung des metastasierten Nierenzellkarzinoms (mRCC) enorme Anstrengungen unternommen. Die derzeitige Standardtherapie in der Erstlinienbehandlung des mRCC sind immunonkologische (IO) Kombinationstherapien.

In diesem Podcast werden die aktuellen Phase-3-Studien CM214 (Nivolumab/Ipilimumab vs. Sunitinib), KN426 (Axitinib/Pembrolizumab vs. Sunitinib), Javelin-renal-101 (Axitinib/Avelumab vs. Sunitinib), CM9ER (Cabozantinib/Nivolumab vs. Sunitinib) und CLEAR (Lenvatinib/Pembrolizumab vs. Sunitinib) diskutiert.

Es werden die primären und sekundären Endpunkte der genannten Phase-3-Studien erörtert. Die Stärken und Schwächen der einzelnen Studien in Bezug auf das Gesamtüberleben, das progressionsfreie Überleben, die objektive Remission, die gesundheitliche Lebensqualität sowie die Sicherheit werden besprochen. Wir gehen auf die Daten sowie die aktuellen ESMO-Leitlinien ein und diskutieren die Auswahl der geeigneten medikamentösen Behandlung für den individuellen Behandlungsweg der Patienten und wir berichten über die Stärken und Schwächen der einzelnen Kombinationen – beginnend mit der geeigneten Erstlinientherapie.

**Schlüsselwörter:**

PD1/TKI, CPI-CPI, mRCC, medikamentöse Behandlung, Erstlinientherapie

**DIGITALE FEATURES**

Dieser Artikel wird mit digitalen Features veröffentlicht, darunter ein Podcast-Audio und eine deutsche Übersetzung, um das Verständnis des Artikels zu erleichtern. Die digitalen Features zu diesem Artikel finden Sie unter <https://doi.org/10.6084/m9.figshare.23146703>

## TRANSCRIPT:

### Podcast-Teilnehmer:

Lydia Albarn: Chefredakteurin von *Advances in Therapy*

Philipp Ivanyi: Medizinische Hochschule Hannover

Viktor Grünwald: Universitätsklinikum Essen

Lydia: Vielen Dank, dass Sie bei diesem Adis-Podcast dabei sind. Die heutige Sitzung wurde durch eine Fortbildungsförderung von Eisai finanziell unterstützt. In dieser Folge werden wir die aktuelle Behandlungslandschaft für das Nierenzellkarzinom diskutieren, und bei mir sind die Experten Dr. Philip Ivanyi und Dr. Viktor Grünwald. Vielen Dank, dass Sie hier sind, und es wäre großartig, ein wenig über Sie beide zu erfahren, bevor wir mit der Diskussion beginnen.

Viktor: Mein Name ist Viktor Grünwald. Ich bin ausgebildeter internistischer Onkologe und arbeite in einer hybriden Position, die sich, wie ich glaube, von vielen anderen Stellen unterscheidet, denn ich arbeite in der Urologie, aber auch in der Abteilung für internistische Onkologie und leite die internistische Behandlung von Patienten mit Krebs des Urogenitaltrakts am Universitätsklinikum Essen, wo wir dieses neuartige Konzept einer interdisziplinären Professur für Krebs des Urogenitaltrakts eingeführt haben.

Philipp: Das klingt großartig, Viktor. Ich beneide dich ein bisschen um diese Stelle; aber egal, mein Name ist Philipp Ivanyi und es ist eine Ehre hier zu sein. Ich arbeite im hohen Norden Deutschlands an der Medizinischen Hochschule Hannover. Ich bin ebenfalls internistischer Onkologe und wir haben hier ein etwas breiteres Spektrum. Einer unserer Schwerpunkte ist jedoch auch die Behandlung von urogenitalen Tumoren und Nierenkrebs und die Beteiligung an Studien. Um ehrlich zu sein, hatte ich die Ehre, als junger Mann (was ich jetzt nicht mehr bin) von Idir, Viktor, ausgebildet zu werden, deshalb freue ich mich sehr über diese Diskussion.

Lass uns also zum Thema kommen. Das erste Thema ist die aktuelle Behandlungslandschaft bei Nierenkrebs und vor allem die ESMO-Leitlinien (in ihrer neuesten Version) [1,2]. Wenn ich mich richtig erinnere, warst du sowohl an der Bearbeitung, Erstellung und an den Empfehlungen sowie allem, was für die Herausgabe einer solchen Leitlinie notwendig ist, beteiligt. Kannst du uns kurz davon berichten?

Viktor: Nun, Philipp, ich glaube, die Nierenkrebslandschaft hat sich in den letzten Jahren wirklich dramatisch entwickelt [3]. Es ist nicht nur so, dass wir mehr Möglichkeiten haben, sondern wir verbessern damit auch das Leben der Patienten, und das halte ich für sehr wichtig. Worin bestehen nun also die Fortschritte auf diesem Gebiet? Ich glaube, sehr wichtig war, dass wir verstanden haben, dass es bei unseren Patienten unterschiedliche Risikokategorien gibt. Das heißt, dass die

Prognose je nach Patientengruppe tatsächlich unterschiedlich ausfällt. Dies wurde ursprünglich von Daniel Heng [diskutiert] - ich glaube, eigentlich war es Motzer - aber Heng hat es dann wirklich auf das Zielgebiet hin vorangebracht [4]. Dort, wo zielgerichtete Therapien zur Verfügung standen, optimierte er den prognostischen Score auf den IMDC (International Metastatic Database consortium) Score [2]. Das ist der Score, den wir verwenden. Außerdem wird er bei der Auswahl von Patienten in den verschiedenen Studien verwendet, und wir haben ihn deshalb auch in unserer Klinik übernommen und nutzen ihn bei der Entscheidungsfindung. Ich denke, dass dies damals zur Zeit der Monotherapien sehr wichtig war. Doch mit dem Aufkommen der Kombinationstherapien hat die Bedeutung abgenommen, da bei den TKI (Tyrosinkinaseinhibitoren)/IO (immunonkologischen)-Kombinationen Tabletten und Immunwirkstoffe kombiniert werden, und diese werden normalerweise für alle Risikogruppen empfohlen. Die Frage ist, ob man in Zukunft diese Kombinationen stärker auf die jeweiligen Risikogruppen zuschneiden will. Momentan differenzieren wir da nicht. Und dann gibt es noch die TKI-freie IPI-NIVO-Kombinationstherapie [mit Ipilimumab und Nivolumab], bei der es sich um eine reine Checkpoint-Inhibitor-Kombination handelt, und die gemäß dem Label stärker an diejenigen mit mindestens einem Risikofaktor gebunden ist [5]. Und ich denke, darin besteht ein gewisser Unterschied, und das sind die Empfehlungen, die den Hauptpfeiler oder Goldstandard in der Erstlinienbehandlung von Nierenkrebs bilden. Dabei fehlt meiner Ansicht nach die Frage, ob man immer mit Kombinationen behandeln muss. Ich bin mir da nicht sicher. Wie denkst du darüber, Philipp? Behandelst du jeden Patienten so oder ist das etwas, das du auf bestimmte Untergruppen von Patienten beschränkst?

Philipp: Du weißt wirklich, wie man direkt tief in die Daten eintaucht, oder? Ich meine, das ist eine 1-Million-Dollar-Frage. Alle Studien, die du erwähnt hast und die in den ESMO-Leitlinien genannt werden (die Kombinationen), sind hinsichtlich ihres Studiendesigns unabhängig von der Risikokategorisierung. Wenn wir uns also die Daten ansehen und nur die Patienten mit günstigem Risiko betrachten, haben wir eine explorative oder Subgruppenanalyse [1,2,6–19]. Was wir dort sehen können, ist, dass Patienten mit günstigem Risiko, die eine PD1/TKI-Kombination erhalten, in dieser analysierten Subgruppe keinen Hinweis auf ein verbessertes Gesamtüberleben zeigen. Fairerweise muss man jedoch sagen, dass was die Prognose dieser Patienten betrifft, wir eine geringe Anzahl von Ereignissen haben. Kürzlich haben wir auf dem ASCO-GU-Symposium eine sehr lange Nachbeobachtung der CHECKMATE-9ER-Studie gesehen, also die Kombination von Cabozantinib und Nivolumab, und da gab es eine sehr lange Nachbeobachtung, und ich weiß nicht, wie du das siehst, [Viktor] aber die Kurven waren ähnlich [20]. Dennoch ist das eine wirklich interessante Frage. Betrachtet man das Gesamtüberleben, muss man, denke ich, evidenzbasiert eine Kombination einsetzen. Andererseits, warum sollte man bei einem 90-jährigen Patienten ein sehr langes Gesamtüberleben anstreben? Es ist also eine wirklich heikle Frage.

Viktor: Ja, ich stimme ich dir vollkommen zu. Ich denke jedoch, dass es sehr wichtig ist, dies vorab zu klären, und wie du schon sagtest, ist die TKI-Monotherapie nach wie vor Bestandteil unserer klinischen Routine, aber sie wird nur bei einem kleinen Teil der Patienten angewendet. Und der Grund dafür ist der fehlende Gesamtüberlebensvorteil. Meiner Ansicht nach ist das das Hauptproblem, das diskutiert wird.

Philipp: Genau.

Viktor: Und du hast auch gesagt, dass die größte Einschränkung darin besteht, dass die Daten nicht reif sind, und ich glaube, das ist ein Punkt, über den nicht oft genug gesprochen wird. Ich meine, wenn man den Median nicht erreicht, wie kann man dann sicher sein, dass es bei einer zwei- oder dreijährigen Beobachtungszeit keinen Gesamtüberlebensvorteil gibt? Man kann es nicht sagen, und ich glaube, die einzig ehrliche Zusammenfassung ist: Wir wissen es nicht. Oder?

Philipp: Ja, das sehe ich auch so.

Viktor: Ich finde das sehr wichtig, weil es unterschiedliche Interpretationen gibt, und die einzigen reifen Daten, die wir zur Verfügung haben, denen zufolge es zu einer Verbesserung kommt, stammen von CHECKMATE-214. Darin wurde IPI + NIVO [Ipilimumab + Nivolumab] in der Erstlinien-Kombinationstherapie bei RCC untersucht. Dabei lag das mediane Gesamtüberleben bei etwa 70 Monaten [19,21,22]. Das zeigt, dass eine 36-monatige Nachbeobachtungszeit nicht ausreicht, um zu dem Schluss zu kommen, dass ein Medikament besser ist als das andere oder dass zwei Medikamente besser sind als ein Medikament. Und ich finde, das muss einmal gesagt werden. Und dann ist da noch die Frage: Worin besteht der Nutzen, von dem wir sagen können, dass es ein echter Vorteil ist? Und ich denke, dass man bei den Kombinationstherapien, selbst bei Patienten mit gutem Risiko, mehr Remissionen und ein besseres progressionsfreies Überleben beobachtet. Was die klinischen Ergebnisse in der Zweitlinientherapie angeht, so würde ich sagen, dass das PFS nach fünf Jahren bei NIVO als Zweitlinientherapie sehr niedrig ist. Wie du weißt, beträgt die PFS-Rate (progressionsfreie Überlebensrate), also der Anteil von Patienten, bei denen es nach 5 Jahren nicht zu einer Progression gekommen ist, etwa 5 % [23]. Meiner Ansicht nach ist der sequenzielle Ansatz möglicherweise nicht optimal, um das alles zu verbessern. Ich denke, man braucht einen Immunwirkstoff im Vorfeld, und bis endgültige Überlebensdaten vorliegen, bin ich wirklich gezwungen, Kombinationen bei meinen Patienten einzusetzen. Und ich denke, du hast auch noch etwas anderes Richtiges gesagt. Braucht man bei einem 90-Jährigen oder bei älteren oder gebrechlichen Patienten etwas mit höherer Toxizität und Wirksamkeit? Oder brauchen wir etwas Schonenderes? Ich stimme dem vollkommen zu. Ich meine, was wir auch in die Leitlinien schreiben, man muss es auf den einzelnen Patienten und die Bedürfnisse der Patienten herunterbrechen, und das bedeutet nicht, dass es sich um eine Blaupause handelt und jeder Patient so behandelt werden muss. Man muss es immer an die Situation des Patienten anpassen.

Philipp: Ja, genau. Was wir gerade sehr schnell gemacht haben, wir haben die Daten kritisch erörtert. Aber ich denke, wir müssen fair bleiben, wenn wir uns die Daten anschauen, die uns vorliegen. Ich meine, es ist wirklich ein Privileg, so viele Phase-3-Studien zu haben, die eindeutig einen Vorteil für das Gesamtüberleben in der Erstlinientherapie zeigen. Um ehrlich zu sein, gegenüber dem, wie wir

vor Jahren mit der TKI-Therapie angefangen haben, ist das eine großartige Entwicklung. Gleichwohl, wenn wir über die Behandlung der Patienten nachdenken, und wenn wir überlegen, was das Beste sein könnte, gab es da einmal einen sehr schönen Leitartikel im *New England Journal* [24]. Ich glaube, er war von Motzer (ich bin mir nicht mehr ganz sicher), und er hat die verschiedenen Verteilungen der Studien sehr schön herausgearbeitet. Es ist also wirklich schwer zu sagen, in welcher Situation oder überhaupt, was das Beste ist. Ich glaube, es ist wirklich schwer zu argumentieren, denn wir haben eine unterschiedliche Risikoverteilung nach IMDC, was du erwähnt hast, und das ist sehr wichtig. Außerdem haben wir in all diesen Phase-3-Studien eine unterschiedliche Verteilung der Metastasenherde und auch der Anteil der Patienten, bei denen eine Nephrektomie durchgeführt wurde, ist unterschiedlich. Dies könnte entweder eine Verteilung des biologischen Risikos oder auch eine unterschiedliche Behandlungslandschaft widerspiegeln, wobei die Anzahl der Nephrektomien sinkt. Und schließlich haben wir auch ein sehr großes Spektrum an mittleren Nachbeobachtungszeiten. Daher denke ich, dass es immer fair ist, sich bei der Betrachtung der Daten dessen bewusst zu sein. Zwar hatten alle Studien denselben Kompetitor, Sunitinib, doch hatten alle Studien unterschiedliche Kohorten, was es wirklich schwierig macht, die Daten zu vergleichen. Würdest du der Hauptaussage zustimmen? Was meinst du, Viktor?

Viktor: Ja, ich denke, dass es eine große Heterogenität zwischen den Studien gibt, und ich denke, das wird deutlich, wenn man sich das Verhalten von Sunitinib in den Studien ansieht, denn es hat sich in den verschiedenen Studien unterschiedlich verhalten, weißt du? Bei einigen ist die Wirksamkeit besser, bei anderen schlechter, und das hängt mit dem Anteil der Patienten zusammen, die ein günstiges oder ungünstiges Risiko haben und mehr oder weniger empfindlich auf TKI ansprechen. Ich denke, das kann man sehen, und wir sehen auch, dass die Heterogenen nicht verglichen werden sollten. Ich denke, das ist wichtig. Und was denkst du, Philipp? Ich meine über die Endpunkte. Wir haben alle möglichen verschiedenen Themen, die in diesen klinischen Studien gesammelt werden. Was ist mit den frühen und späten Endpunkten? Wie wägst du das ab und was ist dir wichtig.?

Philipp: Wenn man sich alle Studien anschaut, die in den ESMO-Richtlinien genannt werden, also die CHECKMATE-214, die KEYNOTE-426, die Javelin-Studie sowie die 9ER- und die CLEAR-Studie [5–7,9,12,13,16,18,19] (*und wir sprechen nicht über neue Studien wie die COSMIC-Studie, weil wir auf die aktuelle Landschaft der täglichen Praxis schauen*), sollte eine Sache noch erwähnt werden: Bis jetzt liegt noch kein Bericht über die Javelin-Studie vor. Also Axitinib im Vergleich zu Avelumab, dem einzigen PDL1-Wirkstoff in diesem Setting. Wir haben keine Daten zum Langzeit-Gesamtüberleben, und laut Statistik ist dies die einzige Studie, die diesen Endpunkt nicht erreicht hat, richtig? Das ist also durchaus erwähnenswert. Wenn man sich den langfristigen Verlauf der Kurve ansieht, ist das hoch spekulativ. Es sieht so aus, als ob sich die Kurven der Prüfpräparate (hier Axitinib und Avelumab) und Sunitinib trennen, aber wir haben bislang keine reifen oder signifikanten Daten zum Gesamtüberleben gesehen. Alle anderen Studien erreichten ein Gesamtüberleben mit einer neuen Therapie (IO-Kombinationen); also zum einen mit IO/IO, dem CTLA-4/PD1-Inhibitor und all den anderen PD1-TKI-Kombinationen. Und die Hazard Ratio, die meines Erachtens eine wichtige Größe ist, also die Hazard Ratio ist bis zu einem gewissen Maße, sagen wir mal, mehr oder weniger gleich und liegt bei 0,65. Das heißt, dass alle genannten Wirkstoffe das Gesamtüberleben verbessern

können. Ich denke, dass dies nach wie vor ein sehr wichtiger Endpunkt ist, den ich mir oft anschau. Im klinischen Kontext ist er nicht immer der Wichtigste, aber ich glaube, dass er im klinischen Alltag, bei der Abwägung aller Endpunkte, die ich bei der Therapieentscheidung berücksichtige, einer der wichtigsten ist. Würdest du dem zustimmen?

Viktor: Ja, ich stimme vollkommen zu. Ich denke, das Gesamtüberleben ist ein zentraler Endpunkt, und man kann sagen, dass alle diese Wirkstoffe das Gesamtüberleben verbessern. Alle bis auf einen erreichten tatsächlich Signifikanz, ich spreche von Statistik, aber aus welchem Grund auch immer war dies in der JAVELIN-Studie nicht der Fall.

Philipp: Ja, aus welchem Grund auch immer, nicht wahr?

Viktor: Ich denke, man kann nicht sagen, warum keine Signifikanz erreicht wurde, da die endgültige Analyse noch nicht vorliegt. Ich denke, es gibt viele Variablen, die zu berücksichtigen sind, um das zu verstehen, und ich denke, wir sind noch nicht so weit. Was ich für wichtig halte, sind die Hazard Ratios, die sich auch verändern; ich meine, was nach 18 Monaten berichtet wurde, ist nach 36 Monaten nicht mehr dasselbe. Meine Interpretation ist also wirklich, oder lass es mich in einem anderen Kontext ausdrücken, ich denke, bei CHECKMATE-214 sieht man sehr stabile Berichte. Die Hazard Ratio war zu jedem Zeitpunkt ungefähr gleich. Bei den TKI/IO-Kombinationen sieht man in den ersten Berichten eine starke Wirkung, die frühe Todesfälle verhindert, und dann sieht man, dass die Hazard Ratio sich verändert. Im Wesentlichen steigt sie an. Ich denke also, dass der stärkste Nutzen der TKI/IO-Kombination tatsächlich bei einem der frühen Zeitpunkte oder bei den frühen Behandlungsergebnissen, das heißt den frühen Todesfällen, liegt.

Philipp: Da hast du Recht. Konzentrieren wir uns also auf den zweiten Endpunkt, und ich erinnere mich daran, dass wir während unserer gemeinsamen Zeit hier in Hannover häufig über das progressionsfreie Überleben diskutiert haben. Mit den Jahren hat sich meine Meinung dazu leicht geändert. Was meinst du dazu? Was ist außerdem dein Eindruck von all diesen Studien im Hinblick auf das progressionsfreie Überleben, und welche klinische Bedeutung hat es, oder hat es überhaupt eine klinische Bedeutung? Oder ist es einfach nur ein Surrogatparameter, um das Studiendesign effizienter und schneller zu machen?

Viktor: Nein, ich denke, das progressionsfreie Überleben ist ein intermediärer Endpunkt, der ausreicht, um festzustellen, ob ein Medikament besser wirkt als ein anderes, oder ob eine Kombination besser ist als ein anderer Einzelwirkstoff oder was auch immer. Und ich glaube, das müssen wir berücksichtigen. Der Goldstandard ist natürlich die Verbesserung des Gesamtüberlebens. Und ich halte das für wichtig, aber auch die Wirksamkeit ist wichtig, denn das ist es, was die Patienten erleben. Wenn man eine Therapie beginnt, möchte man erfolgreich sein, das

heißt man möchte einen Nutzen erzielen. Bei der ersten oder zweiten bildgebenden Untersuchung möchte man eine Tumorkontrolle oder eine Verkleinerung des Tumors sehen. Und ich glaube, das ist etwas, das die Kurve zum progressionsfreien Überleben zeigt; sie gibt einem die Gewissheit, dass ein bestimmtes Medikament oder eine bestimmte Kombination besser wirkt als eine andere. Und meines Erachtens kann man das aus den Kaplan-Meier-Kurven für das progressionsfreie Überleben ablesen.

Philipp: Und kannst du für die Zuhörer kurz einige typische Probleme und Verhaltensweisen der Kombinationen zusammenfassen? Wir sehen hier drei verschiedene Sachen. Das ist zumindest meine Interpretation. Als erstes, wenn wir uns die IO/IO-Kombination ansehen - was wir hier langfristig betrachtet sehen können ist, dass die PFS-Kurve ein bisschen so aussieht wie bei NIVO-IPI, das heißt, dass sie ein Plateau erreicht, was ich immer so interpretiert habe - und darüber kann man streiten: wenn die PFS-Kurve eine Art Plateau erreicht, bedeutet das, dass kein Patient mehr eine Progression aufweist [22]. Und das könnte die Perspektive sein, auch ein Plateau in der Gesamtüberlebenskurve zu sehen. Und obwohl die absolute Zahl des PFS nicht die stärkste ist, ist dies die einzige Kurve, die diese Art von Phänomen zeigt. Die anderen PD1-Kombinationen, die PD1-TKI-Kombinationen, zeigen eine bessere numerische Wirksamkeit; das mediane PFS in Monaten ist sehr viel länger als bei IO-IO-Kombinationen, das gilt insbesondere für die Kombinationen, die einen TKI der dritten Generation enthalten. Es sieht so aus, als sei das PFS ein bisschen besser als bei der Kombination mit einem TKI der zweiten Generation [6,7,9,13]. Siehst du das auch so?

Viktor: Nun, ich glaube, da gibt es einige Einschränkungen. Zunächst einmal treten bei der PFS-Kurve auch Zensoreffekte auf, und am Ende der Kurve hat man nur noch sehr wenige Patienten. Es besteht eine gewisse Unsicherheit darüber, was das wirklich ist. Meines Erachtens hat IPI-NIVO den Vorteil, dass es mehr als nur eine Studie gibt, in der das gleiche Muster erkennbar ist - das ist das Eine. Die andere Sache ist, dass wir einen einzelnen Wirkstoff oder andere Kohorten haben, wie etwa vorbehandelte Patienten, bei denen man das gleiche Phänomen sieht. Ich glaube, dass es langfristige und dauerhafte Effekte gibt, die mit der Immuntherapie verbunden sind. Und ob das genau das ist, was wir bei CHECKMATE-214 gesehen haben, oder etwas anderes, ist Gegenstand von Diskussionen. Und wenn man es mit der TKI-IO-Angelegenheit vergleicht, dann haben die Daten nicht die Reife, dies als Schwanz zu bezeichnen. Wenn man also eine Nachbeobachtung von nur 26 Monaten hat, weiß man nicht, ob danach ein Plateau auftritt oder nicht ...

Philipp: Ja, da hast du vollkommen recht.

Viktor: Aber wenn man sich die absoluten Zahlen zu einem bestimmten Zeitpunkt anschaut, sind sie sehr ähnlich zu dem, was für CHECKMATE 214 berichtet wurde. Der 3-Jahres-Bezugswert für das progressionsfreie Überleben fällt bei IPI-NIVO und, sagen wir, AXI-PEM sehr ähnlich aus, und liegt bei etwa 30 %. Es geht vor allem um den Vergleich zwischen verschiedenen Studien, unterschiedliche Patientenkohorten und so weiter. Damit meine ich, dass es sehr viele Punkte gibt, die einen



Vergleich schwierig machen. Und ich denke, wir müssen noch warten, bevor wir endgültige Schlüsse aus den verschiedenen Studien ziehen, um zu sehen, ob in den anderen Studien ein Plateau auftritt, weil sie immer noch eine Immunkomponente haben. Die Frage wird sein, was IPI wirklich beiträgt oder zum Rückgrat des PD1-Inhibitors hinzufügt. Daher kann man, denke ich, sagen, dass der Schwachpunkt von IPI-NIVO in der primären Progressionsrate liegt. Sie ist genauso so gut oder schlecht wie die von Sunitinib.

Philipp: Sie ist gut oder schlecht. Ja, da bin ich der gleichen Ansicht.

Viktor: Und ich denke, sobald man einen TKI plus IO-Komponente hinzufügt, erreicht man einfach eine sofortige Verbesserung der primären Progression. Und deshalb hat man diese starke Ausbuchtung in der progressionsfreien Überlebenskurve. Das bedeutet, dass es viele leichte Stabilisierungen oder Tumorverkleinerungen gibt, also mehr Wirksamkeit und weniger Progression. Und ich finde, das ist doch schon etwas. Wenn man also Tumorkontrolle braucht, ist ein TKI immer die erste Wahl.

Philipp: Genau. Da stimme ich dir vollkommen zu. Ich war im Laufe der Jahre wirklich beeindruckt. Erinnerst du dich, wir waren auf dem ESMO Kongress 2018 und wir sahen die NIVO-IPI-Daten als erstes und waren beeindruckt. Während des Kongressjahres kamen dann die KEYNOTE- und die JAVELIN-Studie und wir waren wirklich beeindruckt von den objektiven Ansprechraten und der CR-Rate [18,19,25]. Und schließlich sahen wir die 9ER- und die CLEAR-Studie, die ebenfalls unglaublich stark sind. Ich meine, für mich persönlich ist das wirklich einer der Maßstäbe, wenn ich darüber nachdenke, einem Patienten entweder IO/IO oder eine PD1-TKI-Kombination zu geben. Ist bei diesem Patienten eine Remission erforderlich? Was ist dein Eindruck? Schaust du nur auf die radiologischen Bilder oder auch auf die klinischen Symptome oder Laborwerte? Denn ich meine, dies ist wirklich ein Trennungspunkt für die Auswahl der Erstlinientherapie, die für ein objektives Ansprechen erforderlich ist; wie definiert man den Begriff des Remissionsdrucks? In einem begutachteten Artikel wurde ein Wort verwendet, das man so wie „Kindergarten“ aus dem Deutschen entlehnt hat. Es lautet „Zugzwang“ und kommt aus dem Schach [26]. Es ist eine endgültige Bewegung, die man zwangsläufig durchführen muss. Wie definierst du Zugzwang-Remissionsdruck bei Nierenkrebs?

Viktor: Ja, ich meine, es gibt Patienten, die symptomatisch sind und bei denen man einfach eine Remission erzielen muss, weil man weiß, dass es ansonsten zu einer Progression kommt und sie nicht mehr behandelt werden und zum Beispiel die beste unterstützende Behandlung erhalten. In dieser Situation zeigt sich die echte Bedeutung von Zugzwang. Ich meine, man muss ein Ergebnis erzielen. Und dann muss man das Beste machen, was man tun kann. Womit ist die Chance, erfolgreich zu sein, am höchsten? Ich denke, das Beste, was man tun kann sind wahrscheinlich Kombinationen der dritten Generation. Und bei LEN (Lenvatinib) + PEM (Pembrolizumab) haben wir objektive Ansprechraten von über 70 % gesehen, und ich denke, das sind die stärksten Daten, die wir

zur Wirksamkeit gesehen haben [7]. Wir könnten uns also natürlich bei symptomatischen Patienten in diesen Bereich bewegen. Aber ich denke, dass wir in der CHECKMATE 9ER-Studie ebenfalls nur eine sehr geringe primäre Progressionsrate haben. Daher denke ich, dass dies auch eine sehr gute Kombination ist, die man verwenden kann, und das Risiko einer Progression ist höher, wenn man IPI-NIVO verwendet.

Philipp: Da stimme ich vollkommen zu. Es geht um das Gesamtansprechen und das objektive Ansprechen, und es ist sehr wichtig, diese Daten bei der Auswahl der Therapie im Hinterkopf zu haben. Zu Beginn hast du mir die Frage gestellt, ich vermute, du erinnerst dich, was mit der TKI-Monotherapie ist, richtig? Und jetzt kommen wir zu einem Konzept, an dem du schon sehr früh zum Nierenkrebs gearbeitet hast, und das ist die Tiefe der Remission. Gerade haben wir die CR-Raten (komplette Remission) erörtert, die bei LEN-PEM auf insgesamt 16 % steigen, aber alle diese Kombinationen weisen im Vergleich zu Sunitinib gute CR-Raten auf. Bist du der Ansicht, dass dies tatsächlich ein gutes Surrogat für das Erreichen einer frühen Tumorschrumpfung ist [27–29]? Das Erreichen von CR-Raten, insbesondere auch für die Risikogruppe der Gebrechlichen - würdest du sagen, dass dies ein Surrogat für ein gutes Gesamtüberleben ist? Oder handelt es sich dabei eher um ein intellektuelles Konzept?

Viktor: Nein, ich halte das für ein gutes Konzept. Wenn man sich die klinischen Daten für diese Studien ansieht, schneiden Patienten mit einer CR am besten ab; das ist eine Tatsache, denke ich. Und die Frage ist, ob man eine komplette Remission erzielen muss. Oder kann man sich mit einer gewissen Tumorschrumpfung zufrieden geben, die mit mehr oder weniger vergleichbaren Ergebnissen in Hinblick auf das Gesamtüberleben verbunden ist [28]? Und ich denke, man kann sagen, dass man nicht unbedingt eine komplette Remission erzielen muss, um einen größeren Nutzen aus einer bestimmten Behandlung zu ziehen. Und das gilt auch für Sunitinib, es gilt nicht nur für die Kombinationen. Aber der Anteil der Patienten, die von der Kombination profitieren, das heißt Patienten, die ein tiefes Ansprechen erreichen, ist einfach viel höher als unter Sunitinib. Man verbessert also schlicht und einfach die Chancen durch die Kombination, und ich denke, das ist wichtig und stützt die Auffassung, der zufolge die Remission wichtig ist. Wenn man einen höheren Anteil von Patienten hat, die auf die Behandlung ansprechen, erhöht das tatsächlich den Überlebensvorteil, den wir in den verschiedenen Studien sehen. Wie ist das bei dir? Ich meine, es ist doch immer großartig, wenn man eine komplette Remission erreicht, oder? Das freut die Patienten ebenso wie die Ärzte und ist daher eine gute Sache, wenn es passiert!

Philipp: Vor allem für internistische Onkologen oder für alle Leute, die in der Onkologie arbeiten kommt das Überbringen großartiger Neuigkeiten im klinischen Alltag nicht gerade besonders häufig vor, nicht wahr? Aber in der Tat, du hast absolut Recht. Ein Patient ist wirklich glücklich, nachdem er gekämpft und gelitten hat. Ich meine, jede Art von Therapie und jede Art von Krankheit kostet viel Energie und mentale Stärke und verändert das ganze Leben. Und wenn man sagen kann, dass man eine CR erreicht hat, wirkt sich das wirklich positiv auf die Lebensqualität aus. Ich stimme dir also zu. Aber wie du schon sagtest, auch bei anderen Krebsarten muss man nicht immer eine CR erreichen.

Manchmal ist es auch eine Frage von Risiko und Nutzen, und man muss nicht bei jedem Patienten bis zum Äußersten gehen, um eine CR zu erreichen, richtig? Und damit kommen wir zu zwei verschiedenen Parametern der Studien. Lass uns doch noch einmal darüber diskutieren, ob wir bei diesem Thema gleicher Meinung sind und ob es relevant ist oder nicht. Ich spreche von der Dauer der Remission, schauen wir uns da IO/IO im Vergleich zu PD1-TKI gebündelt an. Ich denke, wenn man sich die Daten ansieht, gibt es einen wirklich wichtigen Unterschied, der meiner Meinung nach auch klinisch relevant ist. Die Remissionsdauer, die natürlich auch mit der Behandlung und der Nachbeobachtung zusammenhängt, ist bei NIVO-IPI deutlich länger als bei der PD1-TKI-Kombination, obwohl der Prozentsatz der Patienten, die ein objektives Ansprechen erreichen, geringer ist. Hältst du das für einen wichtigen Parameter?

Viktor: Die Dauerhaftigkeit der Remission ist wichtig. Und es stimmt, nach fünf Jahren beträgt die Dauerhaftigkeit der Remission unter IPI-NIVO ungefähr 56 % und bei den anderen, die den Median erreichten, war es weniger. In der Tat denke ich, dass die Remissionen unter TKI nicht so lange anhalten, und wenn, sagen wir, die Hälfte der Remissionen von der Tablette kommt, weißt du, dass das passiert. Ich meine, die Dauer der Remissionen verschlechtert sich einfach. Das heißt nicht, dass nicht ein Teil der Patienten eine Langzeit-Remission unter TKI-IO-Kombinationen erreicht; es ist also nicht zwangsläufig so zu interpretieren, da es unterschiedliche Patientenkohorten gibt. Wie du bereits sagtest.

Philipp: Ok. Großartig. Zum Schluss, Viktor, es war wirklich toll, dich hier zu haben, mit dir zu diskutieren und die verschiedenen Aspekte aller Studien in den Fokus zu nehmen. Ich glaube, unsere Zuhörer haben jetzt verstanden, wenn sie es nicht schon vorher gewusst haben, dass man, wenn man sich alle Daten genau angeschaut hat, sich der Auswahl der Studien und der studienübergreifenden Auswahl bewusst sein muss, und ich denke, es geht darum, die beste Therapie für den jeweiligen Patienten zu finden.

Viktor: Ja, ich denke, das ist eine sehr gute Zusammenfassung. Das Gute an der Fülle der Möglichkeiten ist, dass man die Wahl hat, und wir befinden uns in einer sehr luxuriösen Lage, in der wir zwischen verschiedenen Behandlungen auswählen und sie optimal auf die entsprechenden Patienten abstimmen können. Ich denke, das ist etwas, das wir tun können, und das ist großartig.

Philipp: Ich danke dir vielmals.

Viktor: Ich danke dir.

## DANKSAGUNG:

**Finanzielle Unterstützung:** Die Entwicklung dieses Podcasts wurde durch eine Fortbildungsförderung von Eisai finanziell unterstützt. Die Autoren wurden von der Zeitschrift ausgewählt, und der Inhalt des Podcasts wurde von den Autoren und der Chefredakteurin der Zeitschrift unabhängig entwickelt. Der Rapid Service und die Open-Access-Gebühren der Zeitschrift wurden ebenfalls durch die Fortbildungsförderung von Eisai finanziert.

**Autorenbeiträge:** Philipp Ivanyi, Viktor Grünwald, Jonas Paul Wiegmann und Hendrik Eggers haben die Datenrecherche zum Thema durchgeführt, Philipp Ivanyi hat den Podcast-Entwurf verfasst, Philipp Ivanyi und Viktor Grünwald haben den Podcast aufgenommen.

**Offenlegung von Interessenkonflikten:** Jonas Paul Wiegmann und Hendrik Eggers bestätigen, dass keine Interessenkonflikte bestehen.

Viktor Grünwald: Finanzielle Interessen, Vortragseinladungen, persönlich: AstraZeneca, Astellas, BMS, Eisai, Ipsen, Janssen-Cilag, Merck, MSD, Pfizer, ONO Pharmaceutical, Novartis/AAA; Beiratsmitglied, persönlich: Apogepha, BMS; Eisai, EUSA Pharm, Cureteq, Debiopharm, Gilead, Janssen-Cilag, Merck, MSD, Pfizer, Novartis, Oncorena, PCI Biotech. Aktien/Beteiligungen, persönlich: AstraZeneca, BMS, MSD, SeaGen. Mitglied der Steuerungsgruppen: BMS, Eisai, Ipsen, Novartis, PharmaMar. Forschungszuschüsse, finanzielle Interessen, institutionell: AstraZeneca, BMS, MSD, Ipsen, Pfizer. Reisekostenzuschüsse: AstraZeneca, Ipsen, Merck, Janssen, Pfizer. Nicht-finanzielle Interessen: Mitgliedschaft: ASCO, ESMO, Deutsche Gesellschaft für Hämatologie und Medizinische Onkologie. Beratertätigkeit: Deutsche Krebsgesellschaft. Leitungsfunktion: Arbeitsgemeinschaft Internistische Onkologie (AIO).

Philipp Ivanyi: Finanzielle Interessen, Vortragseinladungen, persönlich: AstraZeneca, BMS, Eisai, Ipsen, Merck, MSD, Pfizer, Onkowissen, High-5-Oncology; Beiratsmitglied, persönlich: Apogepha, BMS; Eisai, EUSA Pharm, Diciphera, Merck, MSD, Pfizer. Aktien/Beteiligungen, persönlich: AstraZeneca, BMS, MSD. Forschungszuschüsse, finanzielle Interessen, institutionell: BMS, MSD, Merck Ipsen, Pfizer. Reisekostenzuschüsse: AstraZeneca, Ipsen, Merck, Janssen, Pfizer. Nicht-finanzielle Interessen: Mitgliedschaft: ASCO, ESMO, Deutsche Gesellschaft für Hämatologie und Medizinische Onkologie. Beratertätigkeit: Deutsche Krebsgesellschaft. Leitungsfunktion: Arbeitsgemeinschaft Internistische Onkologie (AIO).

**Einhaltung ethischer Richtlinien:** Dieser Artikel basiert auf bereits durchgeführten Studien und enthält keine neuen Studien mit menschlichen Teilnehmern oder Tieren, die von einem der Autoren durchgeführt wurden.

**Datenverfügbarkeit:** Data Sharing gilt nicht für diesen Artikel, da im Rahmen der aktuellen Studie keine Datensätze erstellt oder analysiert wurden.

## LITERATUR:

1. Powles T, Albiges L, Bex A, ESMO Guidelines Committee. eUpdate – Renal Cell Carcinoma Treatment Recommendations. ESMO Ann Oncol [Internet]. 2021; Available from: <https://www.esmo.org/guidelines/guidelines-by-topic/genitourinary-cancers/renal-cell->

carcinoma/eupdate-renal-cell-carcinoma-treatment-recommendations-4

2. Escudier B, Porta C, Schmidinger M, Rioux-Leclercq N, Bex A, Khoo V, et al. Renal cell carcinoma: ESMO Clinical Practice Guidelines for diagnosis, treatment and follow-up†. *Ann Oncol*. Elsevier; 2019;30:706–20.
3. Choueiri TK, Motzer RJ. Systemic Therapy for Metastatic Renal-Cell Carcinoma. *N Engl J Med*. Massachusetts Medical Society; 2017;376:354–66.
4. Motzer RJ, Mazumdar M, Bacik J, Berg W, Amsterdam A, Ferrara J. Survival and Prognostic Stratification of 670 Patients With Advanced Renal Cell Carcinoma. *J Clin Oncol*. Wolters Kluwer; 1999;17:2530–2530.
5. Motzer RJ, Tannir NM, McDermott DF, Arén Frontera O, Melichar B, Choueiri TK, et al. Nivolumab plus Ipilimumab versus Sunitinib in Advanced Renal-Cell Carcinoma. *N Engl J Med*. 2018;378:1277–90.
6. Motzer RJ, Penkov K, Haanen J, Rini B, Albiges L, Campbell MT, et al. Avelumab plus Axitinib versus Sunitinib for Advanced Renal-Cell Carcinoma. *N Engl J Med*. Massachusetts Medical Society; 2019;380:1103–15.
7. Motzer R, Alekseev B, Rha S-Y, Porta C, Eto M, Powles T, et al. Lenvatinib plus Pembrolizumab or Everolimus for Advanced Renal Cell Carcinoma. *N Engl J Med*. Massachusetts Medical Society; 2021;384:1289–300.
8. Choueiri TK, Powles T, Burotto M, Boursillon MT, Zurawski B, Oyervides Juárez VM, et al. Nivolumab + cabozantinib vs sunitinib in first-line treatment for advanced renal cell carcinoma: First results from the randomized phase III CheckMate 9ER trial. *ESMO 2020 696OPR* [Internet]. 2020; Available from: <https://oncologypro.esmo.org/meeting-resources/esmo-virtual-congress-2020/nivolumab-cabozantinib-vs-sunitinib-in-first-line-treatment-for-advanced-renal-cell-carcinoma-first-results-from-the-randomized-phase-iii-checkm>
9. Choueiri TK, Powles T, Burotto M, Escudier B, Boursillon MT, Zurawski B, et al. Nivolumab plus Cabozantinib versus Sunitinib for Advanced Renal-Cell Carcinoma. *N Engl J Med*. Massachusetts Medical Society; 2021;384:829–41.
10. Tannir NM, McDermott DF, Escudier B, Hammers HJ, Aren OR, Plimack ER, et al. Overall survival and independent review of response in CheckMate 214 with 42-month follow-up: First-line nivolumab + ipilimumab (N+I) versus sunitinib (S) in patients (pts) with advanced renal cell carcinoma (aRCC). *J Clin Oncol*. Wolters Kluwer; 2020;38:609–609.
11. Rini BI. Pembrolizumab plus Axitinib Versus Sunitinib as First-Line Therapy for Advanced Clear Cell Renal Cell Carcinoma: Results from 42-Month Follow-up of KEYNOTE-426. *ASCO 2021* [Internet]. [cited 2023 Feb 10]; Available from: <https://www.urotoday.com/conference-highlights/asco-2021/asco-2021-kidney-cancer/130133-asco-2021-pembrolizumab-plus-axitinib-versus-sunitinib-as-first-line-therapy-for-advanced-clear-cell-renal-cell-carcinoma-results-from-42-month-follow-up-of-keynote-426.html>
12. Plimack ER, Rini BI, Stus V, Gafanov R, Waddell T, Nosov D, et al. Pembrolizumab plus axitinib versus sunitinib as first-line therapy for advanced renal cell carcinoma (RCC): Updated analysis of KEYNOTE-426. *J Clin Oncol*. Wolters Kluwer; 2020;38:5001–5001.
13. Rini BI, Plimack ER, Stus V, Gafanov R, Hawkins R, Nosov D, et al. Pembrolizumab plus Axitinib versus Sunitinib for Advanced Renal-Cell Carcinoma. *N Engl J Med*. Massachusetts Medical Society; 2019;380:1116–27.
14. Choueiri TK, Motzer RJ, Rini BI, Haanen J, Campbell MT, Venugopal B, et al. Updated efficacy results from the JAVELIN Renal 101 trial: first-line avelumab plus axitinib versus sunitinib in patients

with advanced renal cell carcinoma. *Ann Oncol*. Elsevier; 2020;31:1030–9.

15. Haanen JB. Efficacy of Avelumab + Axitinib (A + Ax) Versus Sunitinib (S) by IMDC Risk Group in Advanced Renal Cell Carcinoma (aRCC): Extended Follow-up Results from JAVELIN Renal 101. ASCO 2021 [Internet]. [cited 2023 Feb 10]; Available from: <https://www.urotoday.com/conference-highlights/asco-2021/asco-2021-kidney-cancer/130147-asco-2021-efficacy-of-avelumab-axitinib-a-ax-versus-sunitinib-s-by-imdc-risk-group-in-advanced-renal-cell-carcinoma-arcc-extended-follow-up-results-from-javelin-renal-101.html>

16. Choueiri TK. Phase III CLEAR trial in advanced renal cell carcinoma (aRCC): Outcomes in subgroups and toxicity update. ESMO 2021 P660. 2021;

17. Rini BI. Randomized, Open-Label, 3-Arm Phase 3 Study Comparing MK-1308A + Lenvatinib and Pembrolizumab + Belzutifan + Lenvatinib versus Pembrolizumab + Lenvatinib as First-line Treatment for Advanced Clear Cell RCC. ESMO 2021 [Internet]. [cited 2023 Feb 10]; Available from: <https://www.urotoday.com/conference-highlights/esmo-2021/esmo-2021-kidney-cancer/132200-esmo-2021-randomized-open-label-3-arm-phase-3-study-comparing-mk-1308a-lenvatinib-and-pembrolizumab-belzutifan-lenvatinib-versus-pembrolizumab-lenvatinib-as-first-line-treatment-for-advanced-clear-cell-rcc.html>

18. Powles T, Plimack ER, Soulières D, Waddell T, Stus V, Gafanov R, et al. Pembrolizumab plus axitinib versus sunitinib monotherapy as first-line treatment of advanced renal cell carcinoma (KEYNOTE-426): extended follow-up from a randomised, open-label, phase 3 trial. *Lancet Oncol*. 2020;21:1563–73.

19. Motzer RJ, Rini BI, McDermott DF, Frontera OA, Hammers HJ, Carducci MA, et al. Nivolumab plus ipilimumab versus sunitinib in first-line treatment for advanced renal cell carcinoma: extended follow-up of efficacy and safety results from a randomised, controlled, phase 3 trial. *Lancet Oncol*. Elsevier; 2019;20:1370–85.

20. Powles T, Choueiri TK, Burotto M, Escudier B, Bourlon MT, Shah AY, et al. Final overall survival analysis and organ-specific target lesion assessments with two-year follow-up in CheckMate 9ER: Nivolumab plus cabozantinib versus sunitinib for patients with advanced renal cell carcinoma. *J Clin Oncol*. Wolters Kluwer; 2022;40:350–350.

21. Motzer RJ, Escudier B, McDermott DF, Frontera OA, Melichar B, Powles T, et al. Survival outcomes and independent response assessment with nivolumab plus ipilimumab versus sunitinib in patients with advanced renal cell carcinoma: 42-month follow-up of a randomized phase 3 clinical trial. *J Immunother Cancer*. BMJ Specialist Journals; 2020;8:e000891.

22. Motzer RJ, Tannir NM, McDermott DF, Burotto M, Choueiri TK, Hammers HJ, et al. Conditional survival and 5-year follow-up in CheckMate 214: First-line nivolumab + ipilimumab (N+I) versus sunitinib in advanced renal cell carcinoma. ESMO 2021 661P [Internet]. 2021; Available from: <https://oncologypro.esmo.org/meeting-resources/esmo-congress-2021/conditional-survival-and-5-year-follow-up-in-checkmate-214-first-line-nivolumab-ipilimumab-n-i-versus-sunitinib-s-in-advanced-renal-cell-car>

23. Motzer RJ, Escudier B, McDermott DF, George S, Hammers HJ, Srinivas S, et al. Nivolumab versus Everolimus in Advanced Renal-Cell Carcinoma. *N Engl J Med*. Massachusetts Medical Society; 2015;373:1803–13.

24. Escudier B. Combination Therapy as First-Line Treatment in Metastatic Renal-Cell Carcinoma. *N Engl J Med*. Massachusetts Medical Society; 2019;380:1176–8.

25. Escudier B, Tannir NM, McDermott DF, Frontera OA, Melichar B, Plimack ER, et al. CheckMate 214: Efficacy and safety of nivolumab + ipilimumab (N+I) v sunitinib (S) for treatment-naïve advanced

or metastatic renal cell carcinoma (mRCC), including IMDC risk and PD-L1 expression subgroups. *Ann Oncol*. Elsevier; 2017;28:v621–2.

26. Aeppli S, Schmaus M, Eisen T, Escudier B, Grünwald V, Larkin J, et al. First-line treatment of metastatic clear cell renal cell carcinoma: a decision-making analysis among experts. *ESMO Open*. 2021;6:100030.

27. Grünwald V, Powles T, Kopyltsov E, Kozlov V, Alonso Gordoa T, Eto M, et al. Analysis of the CLEAR study in patients (pts) with advanced renal cell carcinoma (RCC): depth of response and efficacy for selected subgroups in the lenvatinib (L) + pembrolizumab (P) and sunitinib (S) treatment arms. *Oncol Res Treat* 202144suppl 41–329 [Internet]. Available from: <https://www.karger.com/Article/Pdf/518417>

28. Grünwald V, Choueiri TK, Rini B, Powles T, George S, Grimm M-O, et al. Association Between Depth of Response and Overall Survival: Exploratory Analysis in Patients With Previously Untreated Advanced Renal Cell Carcinoma (aRCC) in CheckMate 214. *ESMO 2019* 2368 [Internet]. 2019; Available from: <https://oncologypro.esmo.org/meeting-resources/esmo-2019-congress/association-between-depth-of-response-and-overall-survival-exploratory-analysis-in-patients-with-previously-untreated-advanced-renal-cell-carcinoma>

29. Grünwald V, Lin X, Kalanovic D, Simantov R. Early Tumour Shrinkage: A Tool for the Detection of Early Clinical Activity in Metastatic Renal Cell Carcinoma. *Eur Urol*. 2016;70:1006–15.
